# Supplementary material
Source: Springer Nature journal article supplement (https://www.springermedizin.de/resource/supplementary/12955_2008_532_MOESM3_ESM.pdf/9560644)

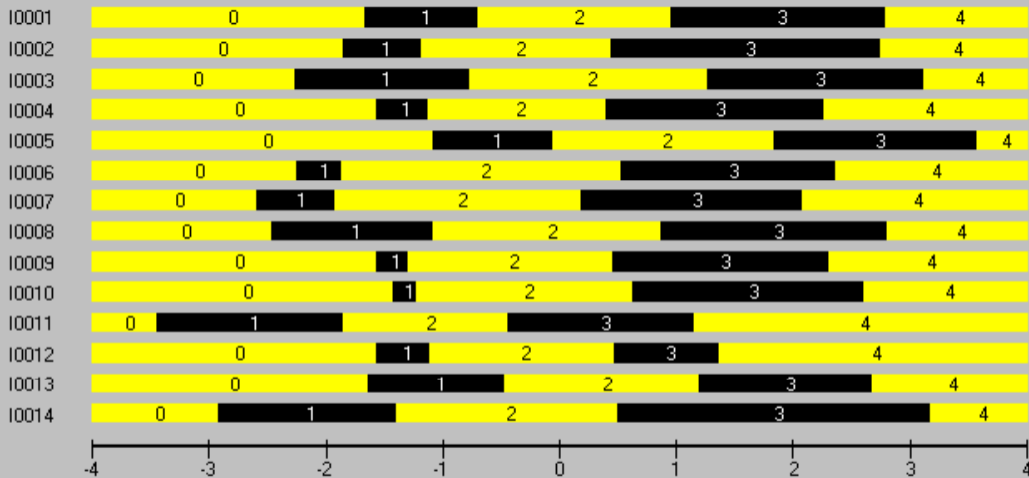

Where 0= None of the time; 1= Rarely; 2= Some of the time; 3=Often and 4= All of the time.

Supplement: MOESM3 [file 9560644]
